# Supplementary material for: Urban-rural differences in the association between blood lipids and characteristics of the built environment: a systematic review and meta-analysis
Source: PubMed Central journal article supplement — BMJ Glob Health. 2019 Jan 24;4(1):e001017. doi: 10.1136/bmjgh-2018-001017 (PMC6347938; doi:10.1136/bmjgh-2018-001017), 2019-01-24
Supplement: bmjgh-2018-001017supp001.pdf [file bmjgh-2018-001017supp001.pdf]

## Appendix A Search strategy

Search strategy in PubMed October 9<sup>th</sup>, 2017 (read from bottom-up).

| Set | Search terms                                                                                                                                                                                                                                                                                                                                                                                                                                                                                                                                                                                                                                                                                                                                                                                                                                                                                                                                                                                                                                                                                                                                                                                                                                                                                                                                                                                                                                                                                                                                                                                                                                                                                                                                                                                                                                                                                                                                                                                                                                                                                                                                                                                                                                                                                                                                                                                                                                                                                                                                           | Result |
|-----|--------------------------------------------------------------------------------------------------------------------------------------------------------------------------------------------------------------------------------------------------------------------------------------------------------------------------------------------------------------------------------------------------------------------------------------------------------------------------------------------------------------------------------------------------------------------------------------------------------------------------------------------------------------------------------------------------------------------------------------------------------------------------------------------------------------------------------------------------------------------------------------------------------------------------------------------------------------------------------------------------------------------------------------------------------------------------------------------------------------------------------------------------------------------------------------------------------------------------------------------------------------------------------------------------------------------------------------------------------------------------------------------------------------------------------------------------------------------------------------------------------------------------------------------------------------------------------------------------------------------------------------------------------------------------------------------------------------------------------------------------------------------------------------------------------------------------------------------------------------------------------------------------------------------------------------------------------------------------------------------------------------------------------------------------------------------------------------------------------------------------------------------------------------------------------------------------------------------------------------------------------------------------------------------------------------------------------------------------------------------------------------------------------------------------------------------------------------------------------------------------------------------------------------------------------|--------|
| #3  | #1 AND #2                                                                                                                                                                                                                                                                                                                                                                                                                                                                                                                                                                                                                                                                                                                                                                                                                                                                                                                                                                                                                                                                                                                                                                                                                                                                                                                                                                                                                                                                                                                                                                                                                                                                                                                                                                                                                                                                                                                                                                                                                                                                                                                                                                                                                                                                                                                                                                                                                                                                                                                                              | 2862   |
| #2  | "Environment Design"[Mesh] OR "City Planning"[Mesh] OR "Spatial Analysis"[Mesh] OR "Geographic Information Systems"[Mesh] OR "Noise"[Mesh] OR "Parks, Recreational"[Mesh] OR "Crowding"[Mesh] OR green space*[tiab] OR greenspace*[tiab] OR green environment*[tiab] OR green infrastructure*[tiab] OR natural space*[tiab] OR natural environment*[tiab] OR natural infrastructure*[tiab] OR environment design[tiab] OR environmental influence*[tiab] OR environmental determinant*[tiab] OR environmental support*[tiab] OR environmental approach*[tiab] OR environmental variable*[tiab] OR environmental attribute*[tiab] OR environmental barrier*[tiab] OR environmental characteristic*[tiab] OR environmental correlat*[tiab] OR environment design*[tiab] OR city planning*[tiab] OR urban design[tiab] OR urban planning*[tiab] OR urban form[tiab] OR town planning*[tiab] OR neighbourhood*[tiab] OR neighborhood*[tiab] OR geospatial[tiab] OR local environment*[tiab] OR rural environment*[tiab] OR urban environment*[tiab] OR objective environment*[tiab] OR perceived environment*[tiab] OR measured environment*[tiab] OR obesogenic environment*[tiab] OR built environment*[tiab] OR physical environment*[tiab] OR geoepidemiology[tiab] OR spatial analysis[tiab] OR land use[tiab] OR spatial access[tiab] OR residential environment*[tiab] OR urban-rural epidemiology[tiab] OR geographic cluster*[tiab] OR residential factor*[tiab] OR residence characteristic*[tiab] OR geographic information system*[tiab] OR geographical information system*[tiab] OR sprawl[tiab] OR zoning[tiab] OR residential location*[tiab] OR residential proximit*[tiab] OR population densit*[tiab] OR food outlet*[tiab] OR grocery store*[tiab] OR fast food density[tiab] OR fast food restaurant*[tiab] OR retail densit*[tiab] OR walkability[tiab] OR cyclability[tiab] OR sidewalk*[tiab] OR pedestrian[tiab] OR cycle path*[tiab] OR cycling lane*[tiab] OR recreational facilit*[tiab] OR recreation facility*[tiab] OR worksite*[tiab] OR sports facilit*[tiab] OR food environment*[tiab] OR food suppl*[tiab] OR public open space*[tiab] OR crowding[tiab] OR park access[tiab] OR urban park*[tiab] OR noise pollution[tiab] OR contextual research[tiab] OR ecological stud*[tiab] OR ecological analys*[tiab] OR remoteness[tiab] OR aesthetic*[tiab] OR active travel*[tiab] OR passive travel*[tiab] OR travel to work[tiab] OR transport to work[tiab] OR public transport*[tiab] OR transportation network*[tiab] | 183891 |
| #1  | "Cholesterol"[Mesh] OR "triglycerides"[MeSH Terms] OR "Lipids"[Mesh:NoExp] OR "Lipoproteins, HDL"[Mesh] OR "Lipoproteins, LDL"[Mesh] OR "Hypertriglyceridemia"[Mesh] OR "Dyslipidemias"[Mesh] OR cholesterol*[tiab] OR epicholesterol*[tiab] OR hdl[tiab] OR ldl[tiab] OR ldl1[tiab] OR ldl2[tiab] OR triglycerid*[tiab] OR lipid[tiab] OR lipids[tiab] OR hypertriglyceride*[tiab] OR triglyceride*[tiab] OR triacylglycerol*[tiab] OR lipoprotein*[tiab] OR dyslipidemi*[tiab] OR dyslipoprotein*[tiab] OR hyperlipemi*[tiab] OR hyperlipidemi*[tiab] OR lipidemi*[tiab] OR lipemi*[tiab] OR hypercholesterolemi*[tiab] OR hypercholesterolaemi*[tiab] OR hypercholesteremi*[tiab] OR hypercholesteraemi*[tiab] OR hyperlipoproteinemi*[tiab] OR hypoprebetalipoproteinemi*[tiab]                                                                                                                                                                                                                                                                                                                                                                                                                                                                                                                                                                                                                                                                                                                                                                                                                                                                                                                                                                                                                                                                                                                                                                                                                                                                                                                                                                                                                                                                                                                                                                                                                                                                                                                                                                    | 723701 |

Search strategy in Embase.com October 9<sup>th</sup>, (read from bottom-up).

| Set | Search terms                                                                                                                                                                                                                                                                                                                                                                                                                 | Result |
|-----|------------------------------------------------------------------------------------------------------------------------------------------------------------------------------------------------------------------------------------------------------------------------------------------------------------------------------------------------------------------------------------------------------------------------------|--------|
| #4  | #3 NOT 'conference abstract'/it                                                                                                                                                                                                                                                                                                                                                                                              | 4972   |
| #3  | #1 AND #2                                                                                                                                                                                                                                                                                                                                                                                                                    | 5867   |
| #2  | 'environmental planning'/exp OR 'city planning'/exp OR 'spatial analysis'/exp OR 'geographic information system'/exp OR 'noise pollution'/exp OR 'land use'/exp OR 'neighborhood'/exp OR 'recreational park'/exp OR 'crowding (area)'/exp OR 'green space*':ab,ti OR greenspace*':ab,ti OR 'green environment*':ab,ti OR 'green infrastructure*':ab,ti OR 'natural space*':ab,ti OR 'natural environment*':ab,ti OR 'natural | 289726 |

|    |                                                                                                                                                                                                                                                                                                                                                                                                                                                                                                                                                                                                                                                                                                                                                                                                                                                                                                                                                                                                                                                                                                                                                                                                                                                                                                                                                                                                                                                                                                                                                                                                                                                                                                                                                                                                                                                                                                                                                                                                                                                                                                                                              |        |
|----|----------------------------------------------------------------------------------------------------------------------------------------------------------------------------------------------------------------------------------------------------------------------------------------------------------------------------------------------------------------------------------------------------------------------------------------------------------------------------------------------------------------------------------------------------------------------------------------------------------------------------------------------------------------------------------------------------------------------------------------------------------------------------------------------------------------------------------------------------------------------------------------------------------------------------------------------------------------------------------------------------------------------------------------------------------------------------------------------------------------------------------------------------------------------------------------------------------------------------------------------------------------------------------------------------------------------------------------------------------------------------------------------------------------------------------------------------------------------------------------------------------------------------------------------------------------------------------------------------------------------------------------------------------------------------------------------------------------------------------------------------------------------------------------------------------------------------------------------------------------------------------------------------------------------------------------------------------------------------------------------------------------------------------------------------------------------------------------------------------------------------------------------|--------|
|    | <p>infrastructure*:ab,ti OR 'environment* design*:ab,ti OR 'environment* influence*:ab,ti OR 'environment* determinant*:ab,ti OR 'environment* support*:ab,ti OR 'environment* approach*:ab,ti OR 'environment* variable*:ab,ti OR 'environment* attribute*:ab,ti OR 'environment* barrier*:ab,ti OR 'environment* characteristic*:ab,ti OR 'environment* correlat*:ab,ti OR 'city planning*:ab,ti OR 'urban design*:ab,ti OR 'urban form*:ab,ti OR 'urban planning*:ab,ti OR 'town planning*:ab,ti OR neighbourhood*:ab,ti OR neighborhood*:ab,ti OR geospatial:ab,ti OR 'local environment*:ab,ti OR 'rural environment*:ab,ti OR 'urban environment*:ab,ti OR 'objective environment*:ab,ti OR 'perceived environment*:ab,ti OR 'measured environment*:ab,ti OR 'obesogenic environment*:ab,ti OR 'built environment*:ab,ti OR 'physical environment*:ab,ti OR geoeidemiology:ab,ti OR 'spatial analysis':ab,ti OR 'land use':ab,ti OR 'spatial access':ab,ti OR 'residential environment*:ab,ti OR 'urban rural epidemiology':ab,ti OR 'geographic cluster*:ab,ti OR 'residential factor*:ab,ti OR 'residence characteristic*:ab,ti OR 'geographic* information system*:ab,ti OR sprawl:ab,ti OR zoning:ab,ti OR 'residential location*:ab,ti OR 'resident* proximit*:ab,ti OR 'population densit*:ab,ti OR 'food outlet*:ab,ti OR 'grocery store*:ab,ti OR 'fast food densit*:ab,ti OR 'fast food restaurant*:ab,ti OR 'retail densit*:ab,ti OR walkability:ab,ti OR cyclability:ab,ti OR sidewalk*:ab,ti OR pedestrian:ab,ti OR 'cycle path*:ab,ti OR cyclepath*:ab,ti OR 'recreation* facilit*:ab,ti OR worksite*:ab,ti OR 'sport* facilit*:ab,ti OR 'food environment*:ab,ti OR 'food suppl*:ab,ti OR 'public open space*:ab,ti OR crowding:ab,ti OR 'park access':ab,ti OR 'urban park*:ab,ti OR 'noise pollution':ab,ti OR 'contextual research':ab,ti OR 'ecological stud*:ab,ti OR 'ecological analys*:ab,ti OR remoteness:ab,ti OR aesthetic*:ab,ti OR 'active travel*:ab,ti OR 'passive travel*:ab,ti OR 'travel to work':ab,ti OR 'transport to work':ab,ti OR 'public transport*:ab,ti OR 'transportation network*:ab,ti</p> |        |
| #1 | <p>'cholesterol'/exp OR 'lipid'/de OR 'triacylglycerol'/exp OR 'high density lipoprotein'/exp OR 'low density lipoprotein'/exp OR 'hypertriglyceridemia'/exp OR 'dyslipidemia'/exp OR cholesterol*:ab,ti OR epicholesterol*:ab,ti OR hdl:ab,ti OR ldl:ab,ti OR ldl1:ab,ti OR ldl2:ab,ti OR triglycerid*:ab,ti OR lipid:ab,ti OR lipids:ab,ti OR hypertriglyceride*:ab,ti OR triglyceride*:ab,ti OR triacylglycerol*:ab,ti OR lipoprotein*:ab,ti OR dyslipidemi*:ab,ti OR dyslipoprotein*:ab,ti OR hyperlipemi*:ab,ti OR hyperlipidemi*:ab,ti OR lipidemi*:ab,ti OR lipemi*:ab,ti OR hypercholesterolemi*:ab,ti OR hypercholesterolaemi*:ab,ti OR hypercholesteremi*:ab,ti OR hypercholesteraemi*:ab,ti OR hyperlipoproteinemi*:ab,ti OR hypoprebetalipoproteinemi*:ab,ti</p>                                                                                                                                                                                                                                                                                                                                                                                                                                                                                                                                                                                                                                                                                                                                                                                                                                                                                                                                                                                                                                                                                                                                                                                                                                                                                                                                                                 | 947830 |

**Search strategy in Web of Science Core Collection, October 9<sup>th</sup>, (read from bottom-up).**

| Set | Search terms                                                                                                                                                                                                                                                                                                                                                                                                                                                                                                                                                                                                                                                                                  | Result  |
|-----|-----------------------------------------------------------------------------------------------------------------------------------------------------------------------------------------------------------------------------------------------------------------------------------------------------------------------------------------------------------------------------------------------------------------------------------------------------------------------------------------------------------------------------------------------------------------------------------------------------------------------------------------------------------------------------------------------|---------|
| #4  | <p>#2 AND #1</p> <p>refined by: research areas: ( acoustics or gastroenterology hepatology or allergy or anthropology or geriatrics gerontology or pathology or health care sciences services or pediatrics or hematology or physical geography or behavioral sciences or immunology or biomedical social sciences or life sciences biomedicine other topics or psychology or public environmental occupational health or cardiovascular system cardiology or sport sciences or endocrinology metabolism or transportation or nursing or nutrition dietetics or environmental sciences ecology or women s studies )</p> <p>Indexes=SCI-EXPANDED, SSCI, A&amp;HCI, ESCI Timespan=All years</p> | 1768    |
| #3  | #1 AND #2                                                                                                                                                                                                                                                                                                                                                                                                                                                                                                                                                                                                                                                                                     | 5126    |
| #2  | <p>TS=("environment design*" OR "city planning*" OR "spatial analysis" OR "geographic information system*" OR "noise" OR "crowding" OR "green space*" OR greenspace* OR "green environment*" OR "green infrastructure*" OR "natural space*" OR "natural environment*" OR "natural infrastructure*" OR "environmental influence*" OR "environmental determinant*" OR "environmental support*" OR "environmental approach*" OR "environmental variable*" OR "environmental attribute*" OR "environmental barrier*" OR "environmental characteristic*" OR "environmental correlat*" OR "urban</p>                                                                                                | 826,364 |

|    |                                                                                                                                                                                                                                                                                                                                                                                                                                                                                                                                                                                                                                                                                                                                                                                                                                                                                                                                                                                                                                                                                                                                                                                                                                                                                                                                                                                                                                                                                                                                                                   |        |
|----|-------------------------------------------------------------------------------------------------------------------------------------------------------------------------------------------------------------------------------------------------------------------------------------------------------------------------------------------------------------------------------------------------------------------------------------------------------------------------------------------------------------------------------------------------------------------------------------------------------------------------------------------------------------------------------------------------------------------------------------------------------------------------------------------------------------------------------------------------------------------------------------------------------------------------------------------------------------------------------------------------------------------------------------------------------------------------------------------------------------------------------------------------------------------------------------------------------------------------------------------------------------------------------------------------------------------------------------------------------------------------------------------------------------------------------------------------------------------------------------------------------------------------------------------------------------------|--------|
|    | <p>design*" OR "urban planning*" OR "urban form" OR "town planning*" OR neighbourhood* OR neighborhood* OR "geospatial" OR "local environment*" OR "rural environment*" OR "urban environment*" OR "objective environment*" OR "perceived environment*" OR "measured environment*" OR "obesogenic environment*" OR "built environment*" OR "physical environment*" OR "geoeidemiology" OR "spatial analysis" OR "land use" OR "spatial access" OR "residential environment*" OR "urban-rural epidemiology" OR "geographic cluster*" OR "residential factor*" OR "residence characteristic*" OR "geographic information system*" OR "geographical information system*" OR "sprawl" OR "zoning" OR "residential location*" OR "residential proximit*" OR "population densit*" OR "food outlet*" OR "grocery store*" OR "fast food density" OR "fast food restaurant*" OR "retail densit*" OR "walkability" OR "cyclability" OR sidewalk* OR "pedestrian" OR "cycle path*" OR cyclepath* OR "recreational facilit*" OR "recreational park*" OR "recreation facility*" OR worksite* OR "sports facilit*" OR "food environment*" OR "food suppl*" OR "public open space*" OR "crowding" OR "park access" OR "urban park*" OR "noise pollution" OR "contextual research" OR "ecological stud*" OR "ecological analys*" OR "remoteness" OR aesthetic* OR "active travel*" OR "passive travel*" OR "travel to work" OR "transport to work" OR "public transport*" OR "transportation network*")</p> <p>Indexes=SCI-EXPANDED, SSCI, A&amp;HCI, ESCI Timespan=All years</p> |        |
| #1 | <p>TS = (cholesterol* OR triacylglycerol* OR "hypertriglyceridemia" OR epicholesterol* OR "hdl" OR "ldl" OR "ldl1" OR "ldl2" OR triglycerid* OR "lipid" OR "lipids" OR hypertriglyceride* OR triglyceride* OR lipoprotein* OR dyslipidemi* OR dyslipoprotein* OR hyperlipemi* OR hyperlipidemi* OR lipidemi* OR lipemi* OR hypercholesterolemi* OR hypercholesterolaemi* OR hypercholesteremi* OR hypercholesteraemi* OR hyperlipoproteinemi* OR hypoprebetalipoproteinemi*)</p> <p>Indexes=SCI-EXPANDED, SSCI, A&amp;HCI, ESCI Timespan=All years</p>                                                                                                                                                                                                                                                                                                                                                                                                                                                                                                                                                                                                                                                                                                                                                                                                                                                                                                                                                                                                            | 838514 |
