# Supplementary material for: Urban-rural differences in the association between blood lipids and characteristics of the built environment: a systematic review and meta-analysis
Source: PubMed Central journal article supplement — BMJ Glob Health. 2019 Jan 24;4(1):e001017. doi: 10.1136/bmjgh-2018-001017 (PMC6347938; doi:10.1136/bmjgh-2018-001017), 2019-01-24
Supplement: bmjgh-2018-001017supp003.pdf [file bmjgh-2018-001017supp003.pdf]

## Appendix C Definitions provided about urban - rural

| Authors                | Definition urban-rural                                                                       |
|------------------------|----------------------------------------------------------------------------------------------|
| Aguilar-Salinas et al. | Reference to the National Institute of Statistics, Geographics and Informatics               |
| Abdul-Rahim et al.     | Reference to the Palestinian Central Bureau of Statistics                                    |
| Ntandou et al.         | Reference to definition of Government of Benin                                               |
| Campos et al.          | Reference to Center of Census and Statistics of Costa Rica                                   |
| Gharbi et al.          | Reference to the National Institute of Statistics of Tunis                                   |
| Al-Nuaim               | Reference to National Population Census                                                      |
| Song et al.            | Reference to China National Bureau of Statistics and the China Ministry of Health Statistics |
| Das et al.             | Only names of places reported                                                                |
| Delisle et al.         | Only names of places reported                                                                |
| Kodaman et al.         | Only names of places reported                                                                |
| Sarrafzadegan et al.   | Only names of places reported                                                                |
| Glew et al.            | Only names of places reported                                                                |
| Xu et al.              | Only names of places reported                                                                |
| Miranda et al.         | Only names of places reported                                                                |
| Mbalilaki et al.       | Only names of places reported                                                                |
| He et al.              | Only names of places reported                                                                |
| Du et al.              | Only names of places reported                                                                |
| Wyatt et al.           | Only names of places reported                                                                |
| Huang et al.           | Only names of places reported                                                                |
| Joshi et al.           | Only names of places reported                                                                |
| Obirikoran et al.      | Only names of places reported                                                                |
| Cai et al.             | Only names of places reported                                                                |
| Lim et al.             | Only names of places reported                                                                |
| Silambuselvi           | Only names of places reported                                                                |
| Weng et al.            | Only names of places reported                                                                |
| Woo et al.             | Only names of places reported                                                                |
| Mollentze et al.       | Only names of places reported                                                                |
| Pandey et al.          | Only names of places reported                                                                |
| Tatsukawa et al.       | Only names of places reported                                                                |
| Mohan et al.           | Only names of places reported                                                                |
| Wang et al.            | Only names of places reported                                                                |
| Snehalatha             | Only names of places reported                                                                |
| Gu et al.              | Only names of places reported                                                                |
| Reddy et al.           | Only names of places reported                                                                |
| Russell-Jones et al.   | Only names of places reported                                                                |
| Pongchaiyakul et al.   | Only names of places reported                                                                |
| Tazi et al.            | None                                                                                         |
| Vrdoljak et al.        | None                                                                                         |
| Gregory et al.         | None                                                                                         |
| Prabhakaran et .       | None                                                                                         |
| Htet et al.            | None                                                                                         |
| Oommen et al.          | None                                                                                         |
| Seck et al.            | None                                                                                         |
| Singh et al.           | None                                                                                         |
| Richter et al.         | None                                                                                         |
| Patel et al.           | None                                                                                         |
