# Supplementary material for: Urban-rural differences in the association between blood lipids and characteristics of the built environment: a systematic review and meta-analysis
Source: PubMed Central journal article supplement — BMJ Glob Health. 2019 Jan 24;4(1):e001017. doi: 10.1136/bmjgh-2018-001017 (PMC6347938; doi:10.1136/bmjgh-2018-001017), 2019-01-24
Supplement: bmjgh-2018-001017supp005.pdf [file bmjgh-2018-001017supp005.pdf]

Mean difference total cholesterol [95% CI]

Author(s) and Year

Studies published between 1980-1999

♀ ♂

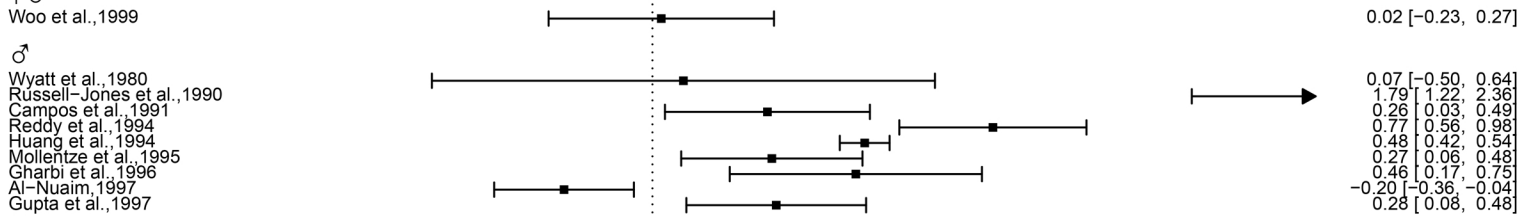

♀

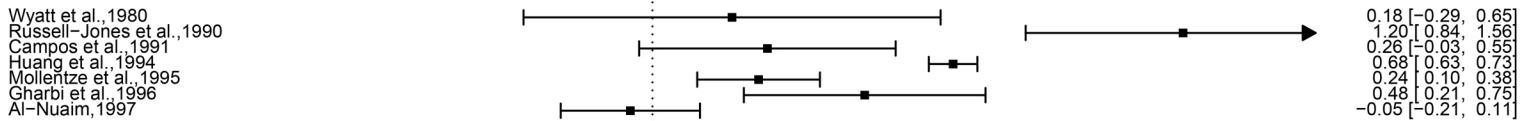

RE model for studies published between 1980-1999 :  
(Q = 249.69 , df = 16 , p = 0.00 ; I<sup>2</sup> = 96.5 %)

Studies published between 2000-2009

♀ ♂

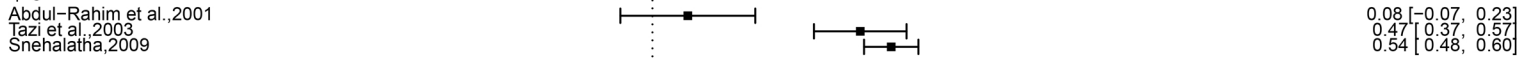

♂

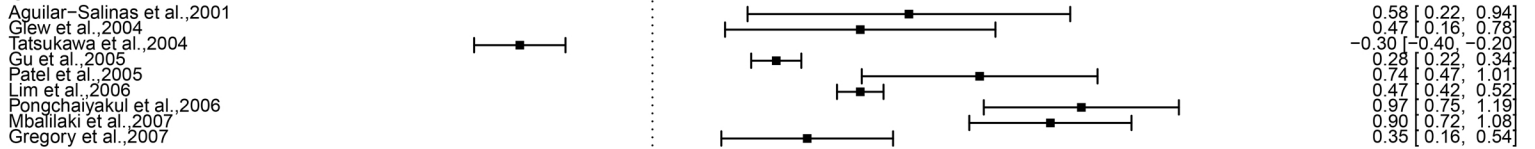

Aguilar-Salinas et al., 2001  
Glew et al., 2004  
Tatsukawa et al., 2004  
Gu et al., 2005  
Patel et al., 2005  
Lim et al., 2006  
Pongchaiyakul et al., 2006  
Mballiki et al., 2007  
Gregory et al., 2007

RE model for studies published between 2000-2009 :  
(Q = 572.59 , df = 20 , p = 0.00 ; I<sup>2</sup> = 97.6 %)

Studies published between 2010-2017

♀ ♂

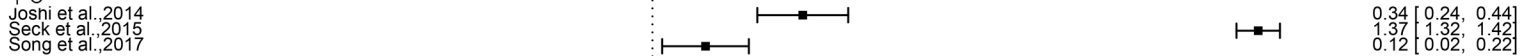

♂

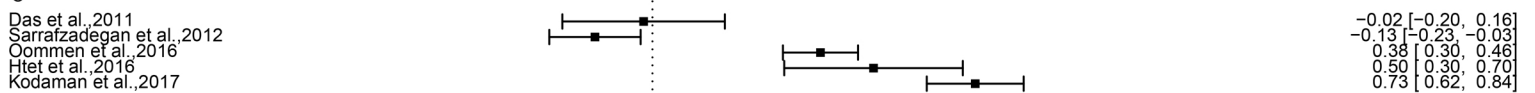

♀

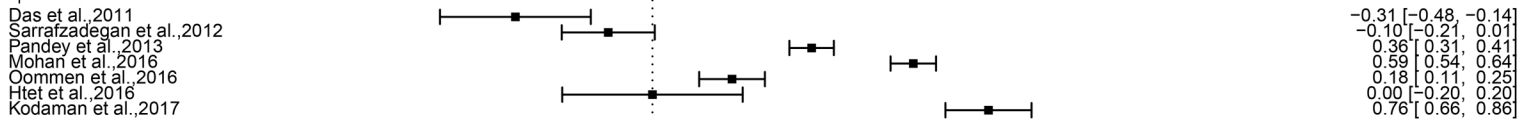

RE model for studies published between 2010-2017 :  
(Q = 1829.25 , df = 14 , p = 0.00 ; I<sup>2</sup> = 99.0 %)

RE model  
(Q = 2945.45 , df = 52 , p = 0.00 ; I<sup>2</sup> = 98.1 %)

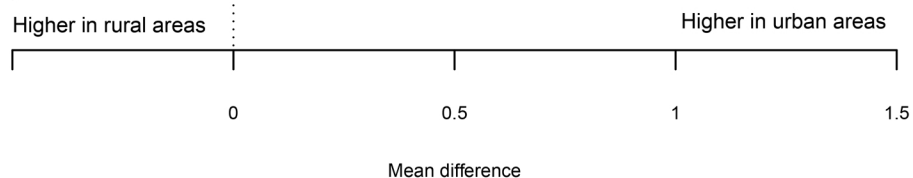

Higher in rural areas

Higher in urban areas

Mean difference
