# Supplementary material for: Urban-rural differences in the association between blood lipids and characteristics of the built environment: a systematic review and meta-analysis
Source: PubMed Central journal article supplement — BMJ Glob Health. 2019 Jan 24;4(1):e001017. doi: 10.1136/bmjgh-2018-001017 (PMC6347938; doi:10.1136/bmjgh-2018-001017), 2019-01-24

Mean difference triglycerides [95% CI]

Author(s) and Year

Studies published between 1980–1999

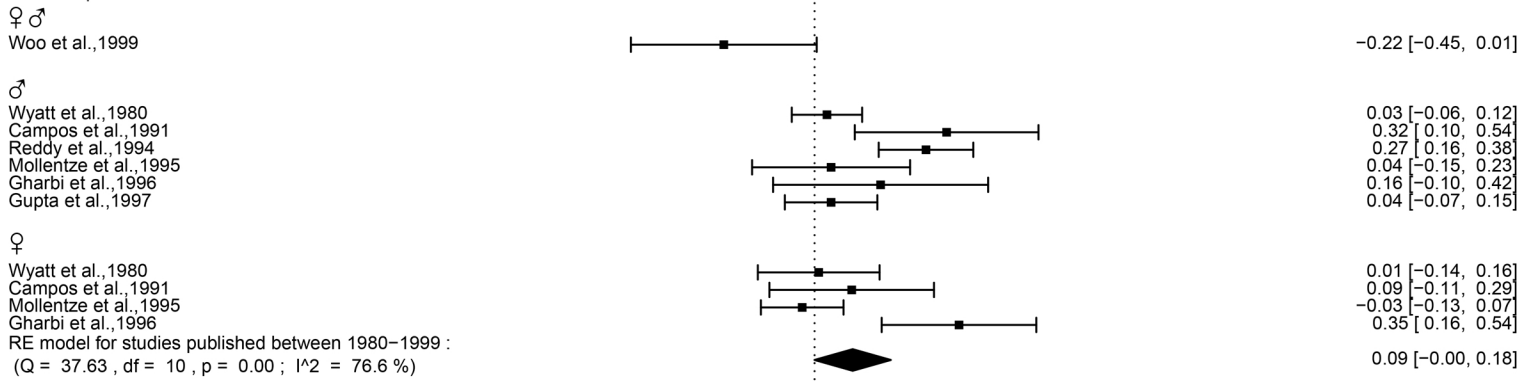

Studies published between 2000–2009

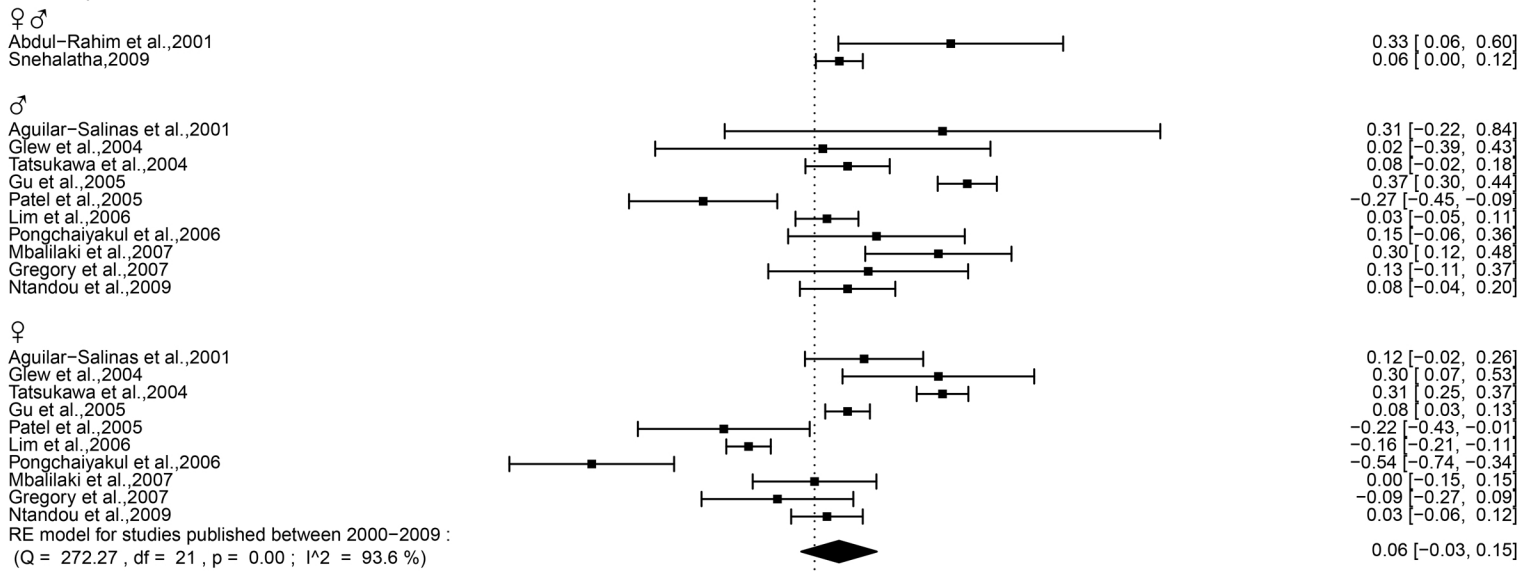

Studies published between 2010–2017

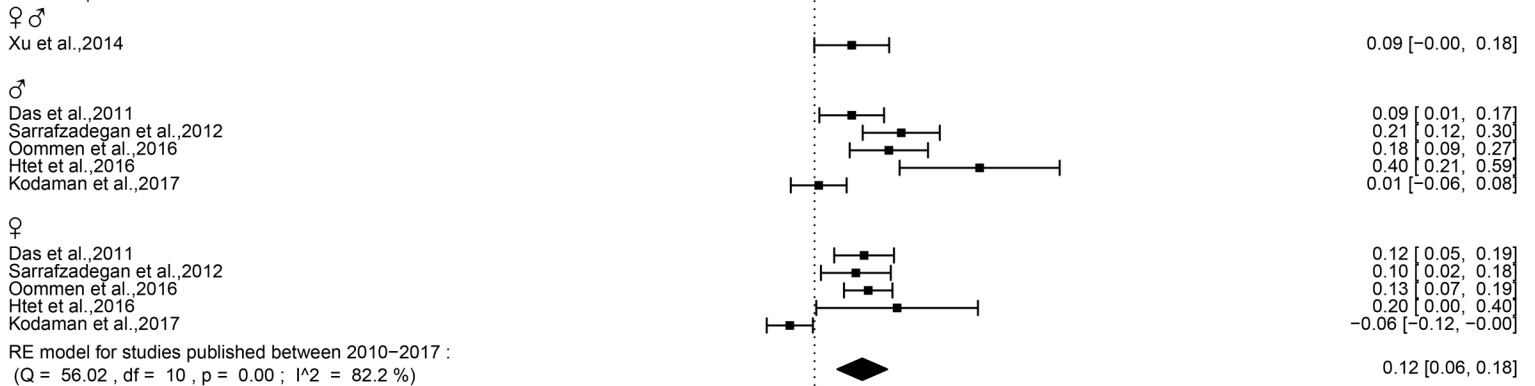

RE model  
(Q = 366.18 , df = 43 , p = 0.00 ; I<sup>2</sup> = 90.4 %)

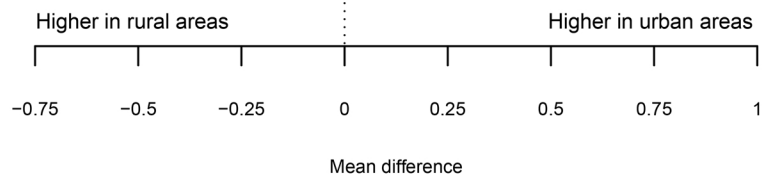

Supplement: bmjgh-2018-001017supp008.pdf [file bmjgh-2018-001017supp008.pdf]
