# Supplementary figures and images for: Urban-rural differences in the association between blood lipids and characteristics of the built environment: a systematic review and meta-analysis
Source: PubMed Central journal article supplement — BMJ Glob Health. 2019 Jan 24;4(1):e001017. doi: 10.1136/bmjgh-2018-001017 (PMC6347938; doi:10.1136/bmjgh-2018-001017), 2019-01-24

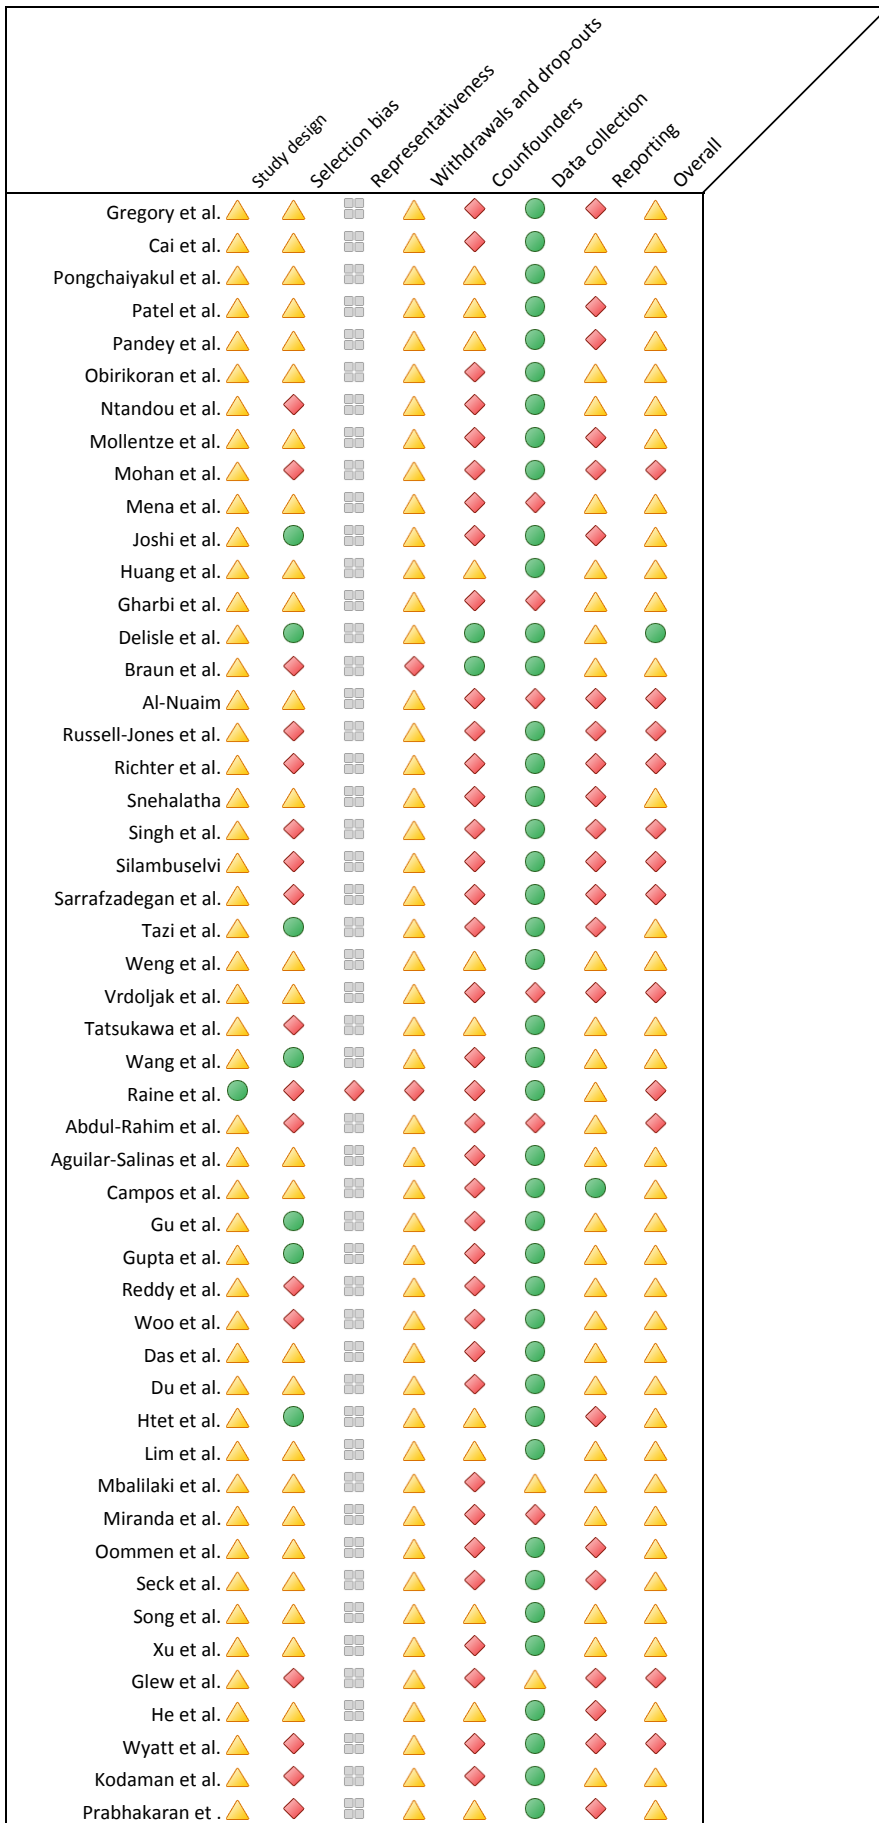

Figure 3 Quality assessment per domain per study

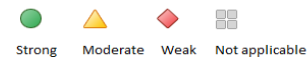

Supplement: bmjgh-2018-001017supp004.pdf [file bmjgh-2018-001017supp004.pdf]
